# Supplementary material for: Protective Effect of Dictyophora Polysaccharides on Sodium Arsenite-Induced Hepatotoxicity: A Proteomics Study
Source: Front Pharmacol. 2021 Nov 26;12:749035. doi: 10.3389/fphar.2021.749035 (PMC8660860; doi:10.3389/fphar.2021.749035)
Supplement: Supplementary file 13 [file Table8.XLSX]

## Sheet: Sheet1
	Table S8 The molecular Function (GO) associated with the differentially expressed proteins in the DIP+As/ As group.
#term ID	Term description	Observed gene count	Background gene count	False discovery rate
GO:0003735	structural constituent of ribosome	16	146	1.3e-16	DAP3,MRPL11,MRPL43,RPL13,RPL17,RPL19,RPL23A,RPL24,RPL26,RPL27,RPL31,RPL34,RPL35A,RPL6,RPL7,RPS13
GO:0005198	structural molecule activity	21	679	4.13e-12	DAP3,KRT1,KRT10,KRT2,KRT9,MRPL11,MRPL43,RPL13,RPL17,RPL19,RPL23A,RPL24,RPL26,RPL27,RPL31,RPL34,RPL35A,RPL6,RPL7,RPS13,TPM3
GO:0003723	RNA binding	14	850	0.0002	HNRNPC,MRPL11,NUDT1,PUS1,RPL19,RPL23A,RPL26,RPL34,RPL35A,RPL7,RPS13,RPS5,SERBP1,SRSF3
GO:0019843	rRNA binding	5	60	0.00026	MRPL11,RPL19,RPL23A,RPS13,RPS5
GO:0003729	mRNA binding	7	198	0.00051	HNRNPC,RPL26,RPL7,RPS13,RPS5,SERBP1,SRSF3
GO:0030280	structural constituent of epidermis	3	14	0.0014	KRT1,KRT10,KRT2
GO:0004449	isocitrate dehydrogenase (NAD+) activity	2	3	0.0051	IDH3B,IDH3G
